# Supplementary material for: OrienX010, an oncolytic virus, in patients with unresectable stage IIIC–IV melanoma: a phase Ib study
Source: PubMed Central journal article supplement — J Immunother Cancer. 2022 Apr 5;10(4):e004307. doi: 10.1136/jitc-2021-004307 (PMC8984036; doi:10.1136/jitc-2021-004307), 2022-04-05
Supplement: jitc-2021-004307supp002.pdf [file jitc-2021-004307supp002.pdf]

## A Phase 1b Study of OrienX010, an Oncolytic Virus, in Unresectable Stage IIIC to IV Melanoma Patients

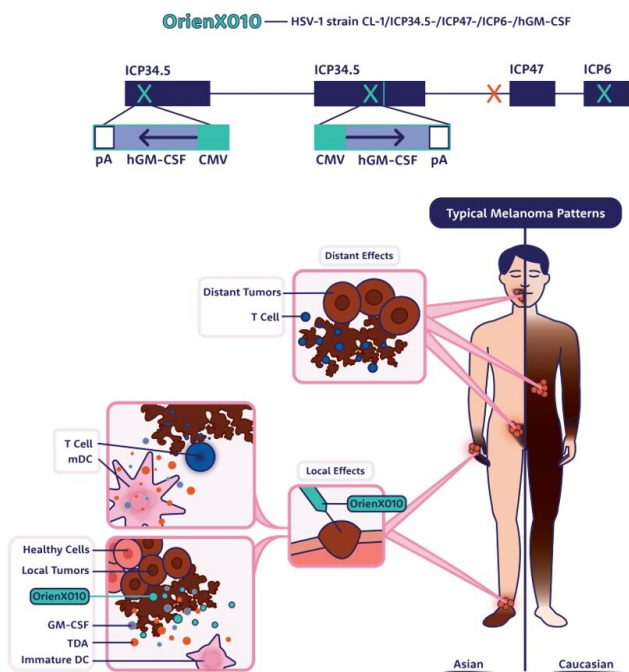

### Authors

ChuanLiang Cui, Xuan Wang, Bin Lian, Qing Ji, Li Zhou, ZhiHong Chi, Lu Si, Xinan Sheng, Yan Kong, Jiayi Yu, Siming Li, LiLi Mao, Bixia Tang, Jie Dai, Xieqiao Yan, Xue Bai, Robert H. I. Andtbacka, and Jun Guo

### Correspondence

[Guoj307@126.com](mailto:Guoj307@126.com)

### In Brief

- OrienX010 is a modified HSV-1 oncolytic virus for the treatment of melanoma
- Well tolerated
- Local oncolytic effects
- Systemic effects via release of tumor derived antigens (TDAs) and maturation of dendritic cells (mDC) by GM-CSF to activate tumor specific T cells
- Anti-tumor effects in injected and noninjected metastases
